# Supplementary material for: Sonication-Assisted Production of Fosetyl-Al Nanocrystals: Investigation of Human Toxicity and In Vitro Antibacterial Efficacy against Xylella fastidiosa
Source: PubMed Central journal article supplement (PMC7353234; doi:10.3390/nano10061174), 2020-06-16
Supplement: nanomaterials-10-01174-s001.pdf [file nanomaterials-10-01174-s001.pdf]

# Sonication-assisted production of fosetyl-Al nanocrystals: investigation of human toxicity and *in vitro* antibacterial efficacy against *Xylella fastidiosa*

## Supplementary Materials

Francesca Baldassarre <sup>1,2,\*†</sup>, Giuseppe Tatulli <sup>3†</sup>, Viviana Vergaro <sup>1,2</sup>, Stefania Mariano <sup>4</sup>, Valeria Scala <sup>3</sup>, Concetta Nobile <sup>2</sup>, Nicoletta Pucci <sup>3</sup>, Luciana Dini <sup>2,5</sup>, Stefania Loreti <sup>3</sup> and Giuseppe Ciccarella <sup>1,2,\*</sup>

<sup>1</sup> Biological and Environmental Sciences Department, Udr INSTM of Lecce University of Salento, Via Monteroni, 73100 Lecce, Italy; viviana.vergaro@unisalento.it

<sup>2</sup> Institute of Nanotechnology, CNR NANOTEC, Consiglio Nazionale delle Ricerche, Via Monteroni, 73100 Lecce, Italy; concetta.nobile@nanotec.cnr.it (C.N.); luciana.dini@uniroma1.it (L.D.);

<sup>3</sup> Council for Agricultural Research and Economics, Research Centre for Plant Protection and Certification of Rome, 00156 Rome, Italy; giuseppe.tatulli@hotmail.it (G.T.); valeria.scala@crea.gov.it (V.S.); nicoletta.pucci@crea.gov.it (N.P.); stefania.loreti@crea.gov.it (S.L.)

<sup>4</sup> Biological and Environmental Sciences Department, University of Salento, Via Monteroni, 73100 Lecce, Italy; stefania.mariano@unisalento.it

<sup>5</sup> Department of Biology and Biotechnology “Charles Darwin”, University of Rome “La Sapienza”, Piazzale Aldo Moro 5, 00185 Roma, Italy

\* Correspondence: francesca.baldassarre@unisalento.it (F.B.); giuseppe.ciccarella@unisalento.it (G.C.); Tel.: +39-0832-319207 (F.B.); +39-0832-319810 (G.C.)

† These authors contributed equally to this work.

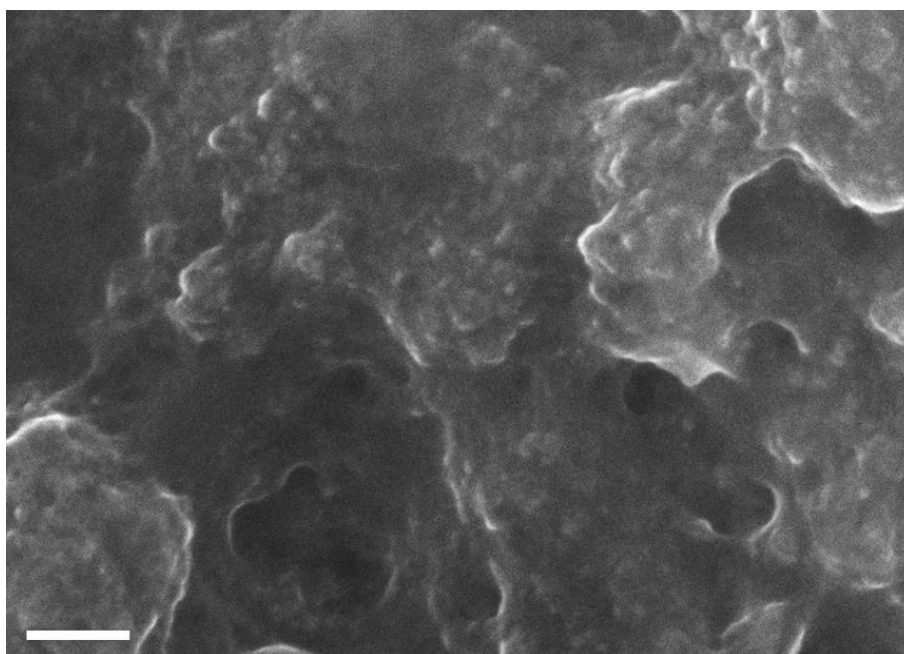

**Figure S1.** Highly magnified detail of a wrinkled structure in the SEM image of figure 3D.

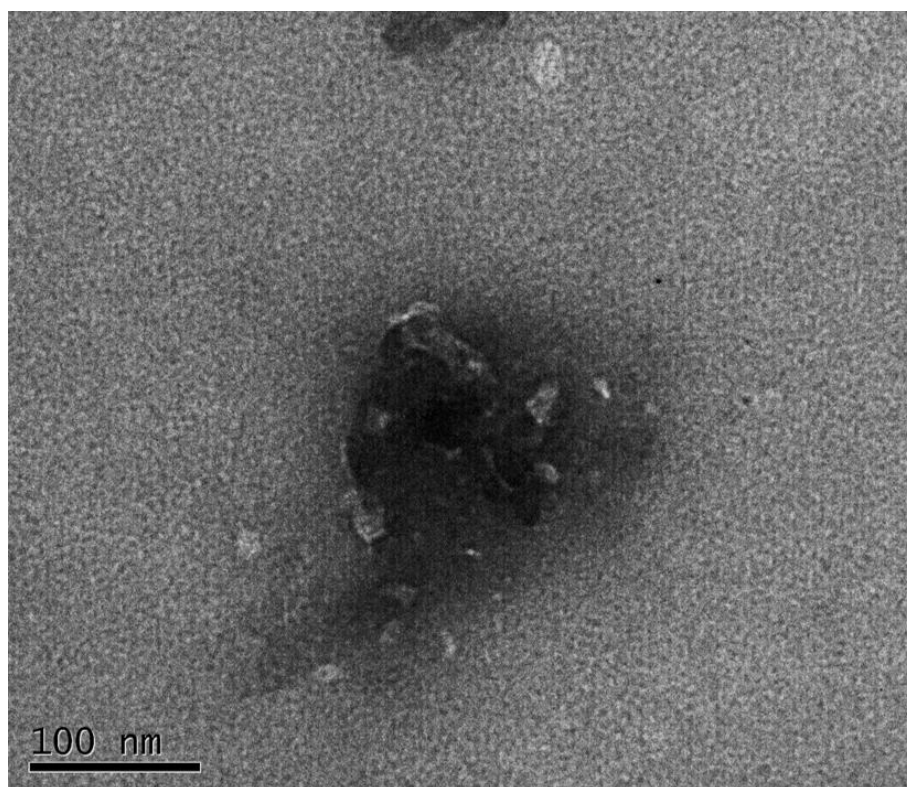

**Figure 2.** TEM image of a CH-nanoFos colloid.
